# Supplementary material for: Interactions of PLGA nanoparticles with blood components: protein adsorption, coagulation, activation of the complement system and hemolysis studies
Source: Royal Society of Chemistry journal article supplement (doi:10.1039/c5nr00733j), 2015-01-01
Supplement: c5nr00733j1.pdf [file c5nr00733j1.pdf]

**Supplementary material**

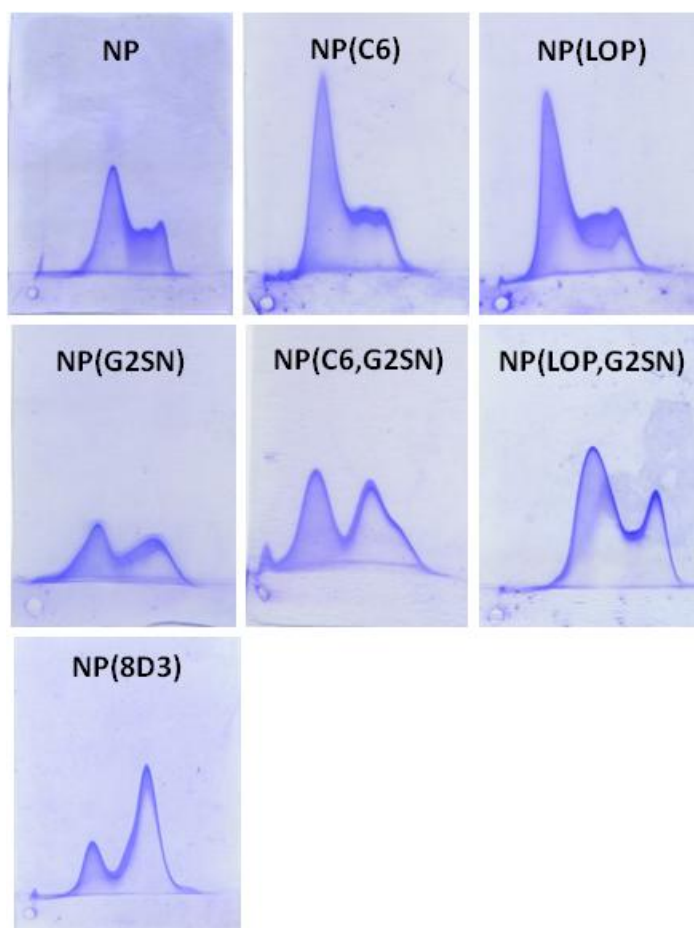

**Figure S1:** Example profiles of the 2D immunoelectrophoresis of complement activation for nanoparticles with different functionalizations and loadings.
